***Title:*** Learning to synchronize: midfrontal theta dynamics during reversal learning

***Abbreviated title:*** Midfrontal theta during reversal learning

***Authors:*** Pieter Verbeke<sup>1</sup>, Kate Ergo<sup>1</sup>, Esther De Loof<sup>1</sup>, Tom Verguts<sup>1</sup>

***Affiliations:*** <sup>1</sup>Department of experimental psychology; Ghent University; B9000

Corresponding author email: [pjverbek.verbeke@ugent.be](mailto:pjverbek.verbeke@ugent.be)

***Number of pages:*** 35

***Number of figures:*** 7

***Number of tables:*** 1

***Number of words:***

***Abstract:*** 197

***Introduction:***648

***Discussion:***1480

***Conflict of interests:*** The authors declare no competing financial interests.

***Acknowledgements:*** PV and KE were supported by respectively grant 1102519N and grant 1153418N from Research Foundation Flanders. EDL and TV were supported by grant BOF17/GOA/004 from the Ghent University Research Council.

## **Abstract**

In recent years, several hierarchical extensions of well-known learning algorithms have been proposed. For example, when stimulus-action mappings vary across time or context, the brain may learn two or more stimulus-action mappings in separate modules, and additionally (at a hierarchically higher level) learn to appropriately switch between those modules. However, how the brain mechanistically coordinates neural communication to implement such hierarchical learning, remains unknown. Therefore, the current study tests a recent computational model that proposed how midfrontal theta oscillations implement hierarchical learning via the principle of binding by synchrony (Sync model). 64-channel EEG signal was recorded while 27 subjects performed a probabilistic reversal learning task. In line with the Sync model, post-feedback theta power showed a linear relationship with negative prediction errors, but not with positive prediction errors. This relationship was especially pronounced for subjects with better behavioral fit (measured via AIC) of the Sync model. Also consistent with Sync model simulations, theta phase-coupling between midfrontal electrodes and temporo-parietal electrodes was stronger after negative feedback. Our data suggest that the brain uses theta power and synchronization for flexibly switching between task rule modules, as is useful for example when multiple stimulus-action mappings must be retained and used.

## **Significance Statement**

Everyday life requires flexibility in switching between several tasks. A key question in understanding this ability is how the brain mechanistically coordinates such switches. The current study tests a recent computational framework (Sync model) that proposed how midfrontal theta oscillations coordinate activity in hierarchically lower task-related areas. In line with predictions of this Sync model, midfrontal theta power was stronger when rule switches were most likely (strong negative prediction error), especially in subjects who obtained a better model fit. Additionally, also theta phase connectivity between midfrontal and task-related areas was increased after negative feedback. Thus, the data provided support for the hypothesis that the brain uses theta power and synchronization for flexibly switching between tasks.

1           Switching between tasks is key to function in a complex and rapidly changing environment.  
2   For instance, when at the pub with friends, behavior is likely guided by different social rules than at  
3   work. However, when the boss suddenly walks into the pub, this might require to flexibly switch  
4   between these two sets of social rules. Importantly, an empirically valid model that explains how the  
5   human brain mechanistically deals with such switches, remains lacking.

6           In experimental settings, this cognitive flexibility is typically tested in a reversal learning setup  
7   (Izquierdo, Brigman, Radke, Rudebeck, & Holmes, 2017). Here, agents must learn task rules consisting  
8   of collections of stimulus-action mappings. During the task, these rules are regularly reversed. One  
9   popular framework to explain performance during reversal learning tasks is the Rescorla-Wagner model  
10   (RW; Rescorla & Wagner, 1972; Widrow & Hoff, 1960). Here, on every trial, obtained reward is used  
11   to update the value of active stimulus-action mappings. By learning fast, the agent can flexibly deal  
12   with changes in task rules. However, when feedback is probabilistic (e.g., Cools, Clark, Owen, &  
13   Robbins, 2002), this approach experiences difficulties. Specifically, a high learning rate will lead agents  
14   to “chase the noise” introduced by probabilistic feedback. In contrast, a low learning rate increases  
15   robustness against noise, but decreases flexibility on rule switches. Thus, some have proposed that  
16   learning rate should be adaptive (e.g., Bai, Katahira, & Ohira, 2014; Behrens, Woolrich, Walton, &  
17   Rushworth, 2007; Silvetti, Vassena, Abrahamse, & Verguts, 2018). In this adaptive learning rate (ALR)  
18   proposal, agents track rule switches by comparing an estimate of reward probability to the received  
19   reward. Consistently high prediction errors indicate that the underlying rule has changed, and learning  
20   rate should be increased. More fundamentally however, irrespective of learning rate flexibility, both the  
21   RW and ALR framework assume that, on every rule reversal, old information is overwritten. Especially  
22   for more complex problems, this is inefficient; as is demonstrated by the problem of catastrophic  
23   forgetting in artificial neural networks (French, 1999)).

24           To overcome catastrophic forgetting, separate mapping collections for every task rule may be  
25   stored (Saez, Rigotti, Ostojic, Fusi, & Salzman, 2015; Wilson, Takahashi, Schoenbaum, & Niv, 2014).  
26   However, this poses the agent with a new problem of keeping track which task rule is currently relevant.  
27   Recent fMRI research focusing on this hierarchical approach toward reversal learning has pointed to

28 midfrontal cortex as responsible neural structure for keeping track of the current task rule (Wilson et  
29 al., 2014). However, how midfrontal cortex mechanistically coordinates neural communication in  
30 switching between task rules, remains an open question.

31 This question was recently addressed by a novel computational framework of hierarchical  
32 learning (Verbeke & Verguts, 2019). As proposed in (Wilson et al., 2014), this model retains separate  
33 mappings for every task rule. It keeps track of rule reversals by calculating prediction error. In order to  
34 guide neural communication between areas holding the appropriate mappings, the model relies on  
35 binding by synchrony (BBS; Fries, 2005, 2015; Gray & Singer, 1989; Womelsdorf et al., 2007) in theta  
36 frequency (4-8 Hz). Specifically, midfrontal theta oscillations synchronize neuronal activity along task-  
37 relevant pathways. Thus, task-relevant neurons can communicate and learn, while stability is achieved  
38 in currently irrelevant pathways.

39 The current study empirically tests this model, further on referred to as Sync model (Fig 1B).  
40 For this purpose, the Sync model is fitted on data of subjects performing a probabilistic reversal learning  
41 paradigm, and empirically compared to alternative models (Bai et al., 2014; Rescorla & Wagner, 1972).  
42 Then, Sync model simulations provided several predictions for EEG measured while subjects  
43 performed this task, specifically in theta frequency (model-driven EEG predictions). First, a linear  
44 relationship between midfrontal theta power and negative prediction errors was predicted, especially in  
45 subjects with good behavioral Sync model fit. Second, a peak of midfrontal theta power was predicted  
46 for data locked to rule switches. Third, phase coupling between midfrontal and posterior electrodes was  
47 predicted to be stronger after negative feedback.

## 48 **Materials and Methods**

### 49 **Materials**

50 The experiment was run on a Dell Optiplex 9010 mini-tower running PsychoPy software  
51 (Peirce et al., 2019). Electrophysiological data were recorded using a BioSemi ActiveTwo system  
52 (BioSemi, Amsterdam, Netherlands) with 64 Ag/AgCl electrodes arranged in the standard international  
53 10–20 electrode mapping (Jasper, 1958), with a posterior CMS-DRL electrode pair. Two reference  
54 electrodes were positioned at the left and right mastoids. Eye movements were registered with a pair of

55 electrodes above and below the left eye and two additional electrodes at the outer canthi of both eyes.  
56 EEG signals were recorded at a sampling rate of 1024 Hz.

57 Models were fitted using the differential evolution method of the SciPy (version 1.4.1)  
58 package in Python (version 3.7.6). Other behavioral analyses were done using R software (R Core  
59 Team, 2017). The electrophysiological data were preprocessed in MATLAB R2016b (The MathWorks  
60 Inc., 2016) using an EEGLAB preprocessing pipeline (Delorme & Makeig, 2004). Also for simulations  
61 of the Sync model MATLAB R2106b was used.

## 62 **Code and Data Accessibility**

63 All code used to provide the results described in the current paper is provided at  
64 [https://github.com/CogComNeuroSci/PieterV\\_public/tree/master/Reversal\\_learning](https://github.com/CogComNeuroSci/PieterV_public/tree/master/Reversal_learning). At publication,  
65 also the data will be made freely accessible at <https://osf.io/wt36f/>.

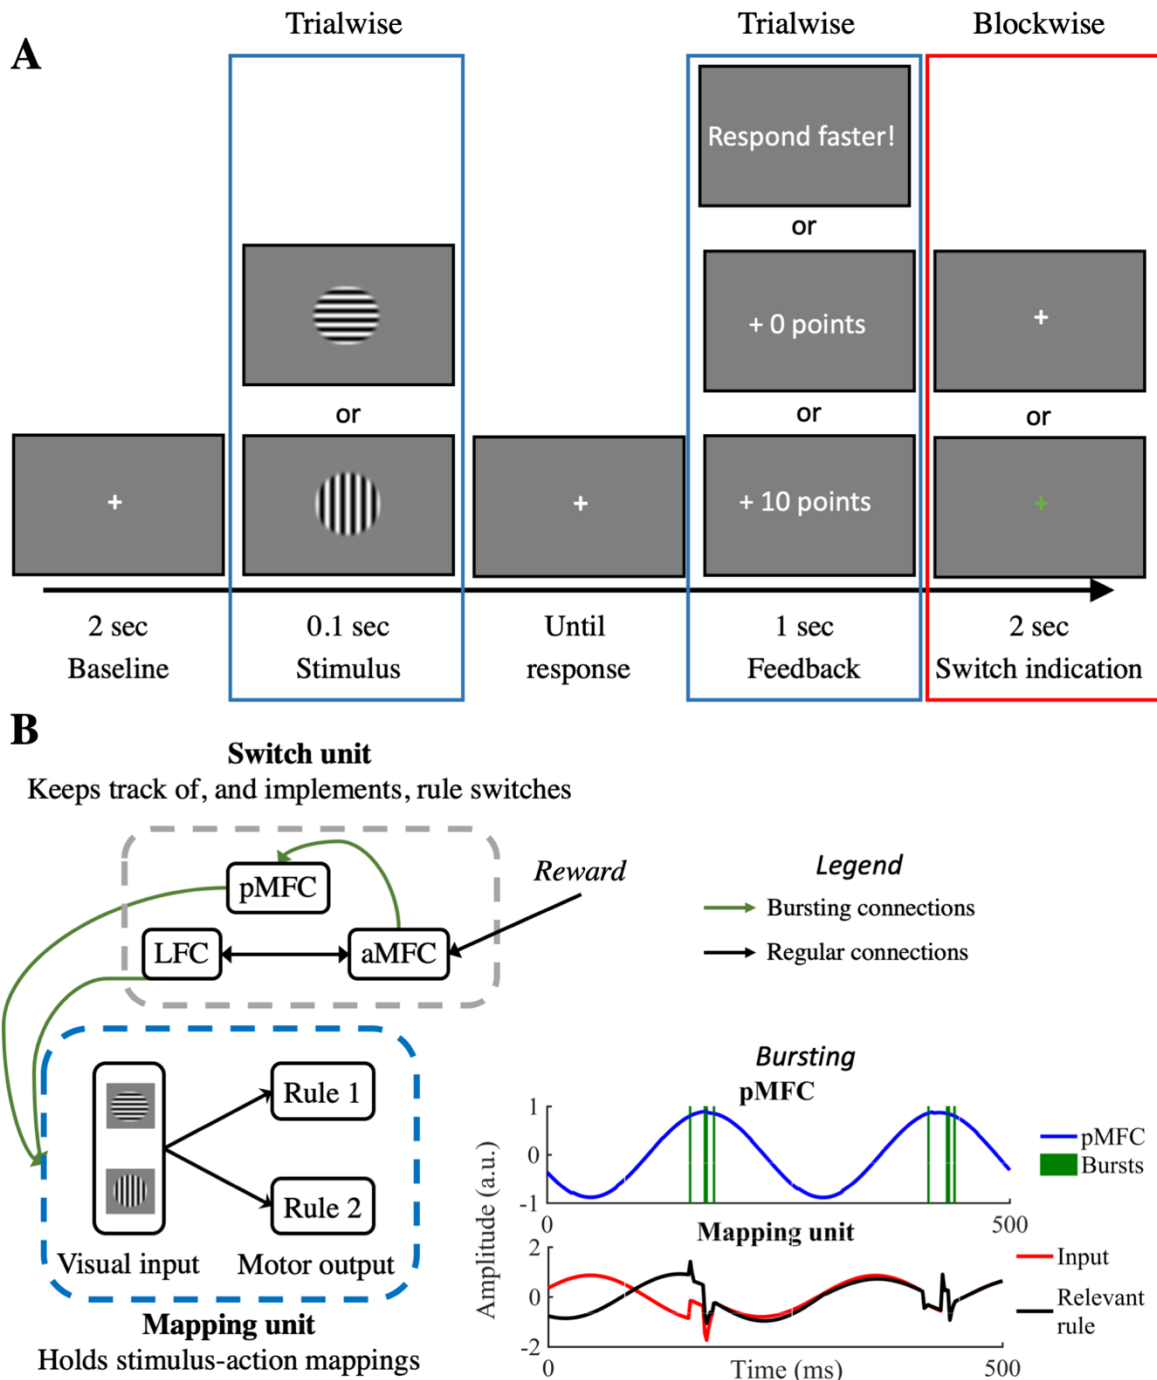

66

67 **Fig 1. Methods. A: The task.** The time course of one trial in the experimental paradigm is shown. Elements  
 68 highlighted by a blue rectangle, such as the presented stimulus and feedback, are manipulated on a trial-by-trial  
 69 basis. Elements highlighted by the red rectangle are manipulated blockwise. Here, the fixation cross after feedback  
 70 was green in one experimental block (half of all trials). In this reporting block, subjects had to press space during  
 71 this period if they thought the rule had switched. **B: The Sync model.** The left diagram represents a schematic  
 72 overview of the Sync model. In the lower right corner, a detailed illustration shows how bursts originating in the

73 pMFC synchronize task-relevant areas in the Mapping unit (see (Verbeke & Verguts, 2019) for detailed  
74 explanation).

75

## 76 **Experimental Task**

77 Both the model (27 simulations) and human subjects ( $N = 27$ ) performed a probabilistic  
78 reversal learning task (see Fig 1A). Agents had to learn task rules consisting of two stimulus-action  
79 mappings which were regularly reversed during the task. Every trial started with a centrally presented  
80 white fixation cross for 2 seconds. Then the stimulus was presented for a period of 100 milliseconds.  
81 This stimulus was a centrally presented circular grating with a raised-cosine mask and a size of 7 visual  
82 degrees. The grating was either vertically or horizontally oriented. After stimulus presentation, the  
83 screen turned blank until response. Responses were given by pressing the ‘f’- (left) or ‘j’-key (right) on  
84 an azerty keyboard. In task rule 1, the horizontal stimulus mapped to a left response and the vertical  
85 stimulus to the right response; this was reversed for task rule 2. During the task (480 trials), 15 rule  
86 switches were introduced. These rule switches occurred at random (uniform distribution from 15 to 45  
87 trials after the previous task switch). After response, feedback was presented in the center of the screen.  
88 This feedback consisted of ‘+10 points’ for rewarded trials, ‘+0 points’ for unrewarded trials or  
89 ‘Respond faster!’ when response times (RT) were more than 1 second. After feedback, the fixation  
90 cross appeared again for another 2 seconds. Crucially, the experiment was divided into two  
91 experimental blocks (240 trials each). In one block, the reporting block, the post-feedback fixation cross  
92 was presented in green. During this period, subjects were instructed to press the space bar if they thought  
93 the task rule had switched. The purpose of this approach was to obtain an indication of when the subject  
94 reached his or her own ‘Switch threshold’, as happens in the Sync model. This was only done during  
95 one block, so critical changes due to this difference in task structure could be checked. The order of the  
96 two blocks was counterbalanced across subjects. In between blocks, as well as three times within a  
97 block, subjects were allowed a small break. This break could only occur if there was no rule switch  
98 within 10 trials from the break.

## 99 **Human Testing Procedure**

100 34 subjects participated in this study, 7 subjects were removed because of either technical  
101 problems with the EEG recording (4) or an inability to give a correct response on more than 2/3 of the  
102 trials (3), resulting in  $N = 27$ . Subjects were told they would receive €25 for their participation, with a  
103 possibility to earn up to €3 extra reward depending on their performance.

104 Before starting the task, the subject had to go through two short practice sessions with gratings  
105 that were tilted 45° to the left or to the right relative to a vertical line. In the first practice session, the  
106 subject performed 30 trials with only one task rule. Here, the goal was to let the subject get acquainted  
107 with the general paradigm and learn a task rule through probabilistic feedback. Subjects were only  
108 allowed to continue to the second practice session if they performed above chance level (50%) and  
109 could report the correct task rule to the experimenter. If not, they performed this practice session again.  
110 In the second practice session, subjects performed 60 trials of the task with 3 rule switches and with the  
111 post-feedback green fixation cross (as in the reporting block). In this session, subjects pressed the space  
112 bar to indicate a task switch and received feedback for each press. The press was considered correct if  
113 subjects responded within 10 trials from the actual rule switch. They were allowed to continue to the  
114 next task if they were able to perform above chance level and had at least 1 correct indication of a rule  
115 switch. After successfully performing both practice sessions, subjects performed 480 trials of the actual  
116 task.

## 117 **Behavioral Analyses**

118 To check for differences between the reporting block (green fixation cross) and the non-  
119 reporting block (see Experimental Task and Fig 1A), paired t-tests were performed for both accuracy  
120 and RT, depending on experimental block. In order to deal with the skewed distribution of RT, the  
121 natural log of RT was used for all analyses. Additionally, trials with too late responses were excluded  
122 for both behavioral and EEG analyses.

## 123 **Model Analyses**

### 124 *Model formulation*



125 More extensive analyses of behavioral data were done with a model-based approach. Current  
126 work aims to test the Sync model (Verbeke & Verguts, 2019), but two baseline models were fitted as  
127 well. In the following section, we first provide a conceptual overview, followed by a more detailed  
128 description of all three models. Then, we describe how model fit was evaluated.

129 An overview of model architecture is provided in Fig 1B. The RW and ALR model are  
130 restricted to only the Mapping unit (with one rule module). The RW model (Rescorla & Wagner, 1972)  
131 had a constant learning rate while the ALR model (Bai et al., 2014), was implemented with an adaptable  
132 learning rate. The Sync model consists of two units, the Mapping and Switch unit. The Mapping unit  
133 contains a classic network with 2 layers (visual input and motor output). Here, weights are adapted with  
134 the RW algorithm (Widrow & Hoff, 1960). In the Sync model, 4 nodes (2 for each response option) at  
135 the motor output layer, are divided in 2 rule modules, one for each task rule. Hence, as in (Wilson et  
136 al., 2014), the Mapping unit holds separate stimulus-action mappings for each task rule. In addition, a  
137 Switch unit forms a hierarchically higher network modeled after primate prefrontal cortex. This Switch  
138 unit keeps track of switches in task rule. Specifically, the Switch unit consists of the lateral frontal  
139 cortex (LFC), posterior medial frontal cortex (pmFC) and anterior midfrontal cortex (amFC). Here, the  
140 LFC holds pointers (Botvinick et al., 2001) that indicate which rule should be synchronized in the  
141 Mapping unit. Since BBS implements gating, allowing efficient communication between synchronized  
142 nodes and inefficient communication between non-synchronized nodes (Fries, 2005, 2015), the agents'  
143 behavior will be guided by the synchronized rule. This synchronization process is then executed by the  
144 binding by random bursts principle (Springer & Paulsson, 2006; Verguts, 2017; Zhou, Chen, & Aihara,  
145 2005). In the Sync model, a theta-frequency-paced signal produced in the pmFC is responsible for  
146 sending these bursts (see (Verbeke & Verguts, 2019; Verguts, 2017) for details). The amFC contains a  
147 neural network (for simplicity not shown in Fig 1B) that is adapted from previous work (Silvetti,  
148 Seurinck, & Verguts, 2011). Here, again RW learning is employed but on a hierarchically higher level.  
149 More specifically, the amFC learns an expected reward ( $V$ ) for the currently used rule module (see  
150 equation (4)). Which rule module is currently used, is extracted from activation in the LFC. The  
151 expected reward is then compared to an external reward signal ( $Rew$ ; Reward in Fig 1B) in order to

152 compute prediction errors. The negative prediction error signal is propagated to both the Accumulator  
153 neuron (within the aMFC neural network) and to pMFC. A single negative prediction error increases  
154 (via bursting) the power of the theta signal in pMFC (bursting connection in Fig 1B; see (Verbeke &  
155 Verguts, 2019) for details). Instead, the Accumulator neuron evaluates the prediction error signal on a  
156 slower time scale, and thus requires multiple prediction errors before activation in the Accumulator  
157 neuron reaches its Switch threshold (see equation (5)). When this happens, it signals the need for a  
158 switch to the LFC. Correspondingly, the LFC will change the signal to the Mapping unit, and  
159 synchronize another rule module. In sum, bursts received by the Mapping unit are the result of a  
160 cooperation between LFC and pMFC. Here, the pMFC determines the intensity of theta bursts while  
161 the LFC determines which task rule in the Mapping unit is susceptible to the bursts. For further details  
162 see (Verbeke & Verguts, 2019).

163 All nodes in the visual input and motor output layer of the Mapping unit as well as the pMFC  
164 are oscillatory nodes. In line with previous work (Verguts, 2017), oscillatory nodes contain neuronal  
165 triplets. In the pMFC, which executes top-down control by sending bursts, activity oscillates at a theta  
166 (6 Hz) frequency, in line with suggestions of previous empirical work (Cavanagh & Frank, 2014;  
167 Womelsdorf, Johnston, Vinck, & Everling, 2010). Different from our previous modelling work, a theta  
168 frequency was used in the Mapping unit (see Discussion) as well. Since bursts lead to a significant  
169 increase of power, a radius parameter ( $r_{min}$ ) is implemented in order to attract power back to baseline  
170 after a burst. Since continuously high pMFC power is computationally suboptimal and empirically  
171 implausible (Holroyd, 2016), power in the pMFC was attracted towards a smaller radius,  $r_{min} = .50$ . How  
172 fast oscillations decay to baseline is determined by a damping parameter ( $D$ ) which was set to  $D = .30$   
173 in the Mapping unit. Since the pMFC not only receives burst but also sends them, a slower decay  $D =$   
174  $.01$  was implemented here to allow a sufficient activity window ( $\sim 500$  ms/3 theta cycles) for bursts to  
175 be sent. In order to reduce model complexity, no oscillations were used in the LFC and aMFC. For a  
176 full description of model dynamics see (Verbeke & Verguts, 2019).

177 We turn now to the more detailed descriptions. On every trial, the RW and ALR models  
178 respond with a probability based on the following softmax rule:

179

$$p(a) = \frac{e^{Q(s,a)/\tau}}{\sum e^{Q(s,a_i)/\tau}} \quad (1)$$

180

181 in which  $Q(s,a)$  is the value of a given stimulus-action pair  $(s, a)$ .  $\tau$  is the temperature parameter which  
182 determines how strongly the subject explores different actions. On every trial,  $Q(s,a)$  is updated based  
183 on the rule:

184

$$Q(s,a)_{j+1} = Q(s,a)_j + \alpha * (Rew - Q(s,a)_j) \quad (2)$$

185

186 in which  $\alpha$  is the Mapping learning rate and  $Rew$  is the reward received by the agent.

187 In the ALR model (Bai et al., 2014), the learning rate changes in an adaptive manner. Here,  
188 the Mapping learning rate is updated on every trial by

189

$$\alpha_{j+1} = \eta * |Rew - Q(s,a)_j| + (1 - \eta) * \alpha_j \quad (3)$$

190

191 in which  $\eta$  determines how strongly the learning rate is influenced by the current difference between  
192  $Rew$  and  $Q$  (lower-level prediction error).

193 The third model is the Sync model. In order to implement BBS, on every trial multiple time  
194 steps were simulated in which oscillations occurred. Here, motor nodes accumulate activation over  
195 time. The motor node with the maximal accumulated activation over time, was considered as the model  
196 response. Values of stimulus action pairs ( $Q$ ) in each rule module (R) are updated similar to equation  
197 (2). As described above, this model has an additional Switch unit which adds a hierarchical learning  
198 algorithm on top of the RW (fixed learning rate) model in the Mapping unit. This Switch unit evaluates  
199 whether there was a rule switch. More specifically, it learns a value for every rule module by

200

$$V(R)_{j+1} = V(R)_j + \alpha_{high} * (Rew - V(R)_j) \quad (4)$$

201

202 in which  $\alpha_{high}$  is the higher order Switch learning rate. The absolute difference between the expected  
203 value  $V(R)$  in equation (4) and the obtained  $Rew$  (i.e., the unsigned prediction error) is accumulated in  
204 the Accumulator neuron ( $A$ ) via

205

$$A_{j+1} = \begin{cases} \gamma * A_j + (1 - \gamma) * |Rew - V(R)_j| & \text{if } (Rew - V(R)_j) < 0 \\ \gamma * A_j & \text{otherwise} \end{cases} \quad (5)$$

206

207 Here,  $\gamma$  is the Cumulation parameter which determines how strongly the Accumulation neuron is  
208 affected by a single prediction error. While a low Cumulation parameter causes the agent to strongly  
209 weigh single prediction error and therefore regularly switch between rule modules, a high Cumulation  
210 parameter implements a more conservative approach. Since switches are only required when negative  
211 feedback occurs, the Accumulator neuron is selective for negative prediction errors. When several  
212 negative prediction errors occur in succession, this Accumulator neuron will reach a Switch threshold  
213 which is set to .5, and the model will switch to another rule module ( $R$ ) in the Mapping unit.

214 For behavioral data fitting only, the full Sync model was simplified by introducing a hard gating  
215 process between task rules instead of BBS and a response selection mechanism similar to (1). This  
216 allowed to skip the loop of 1500 timesteps every trial, which was needed to simulate oscillations. We  
217 refer to this model as the behavioral Sync (bSync) model.

218 *Model evaluation*

219 For each subject, the goodness of fit of these three models was compared by using three  
220 measures. The log-likelihood ( $LL$ )

221

$$LL = \sum_{j=1}^J a_j * \ln(p(a_j = 1)) + (1 - a_j) * \ln(p(a_j = 0)) \quad (6)$$

222

223 in which  $p(a)$  is the probability of the given action (see equation (1)) and  $J$  represents the number of  
224 trials. The AIC uses this LL but includes a penalty for the number of parameters ( $k$ ) that were used in  
225 the model:

226

$$AIC = 2 * k - 2 * LL \quad (7)$$

227

228 From this AIC, AIC weights ( $wAIC$ ) can be derived which allows to make a relative comparison  
229 between the model fit of the three different models. These  $wAIC$  values are computed as

230

$$wAIC = \frac{e^{-\frac{1}{2}\Delta AIC_m}}{\sum_{m=1}^M e^{-\frac{1}{2}\Delta AIC_m}} \quad (8)$$

231

232 in which  $M$  is the number of models that are compared (3) and

233

$$\Delta AIC_m = AIC_m - \min(AIC) \quad (9)$$

234

235 Here,  $\min(AIC)$  is the lowest AIC value out of the three models for that subject. Thus, Equation (8)  
236 results in a  $wAIC$  value for each model. The sum of all three  $wAIC$  values is 1, and if all three models  
237 fit the data equally well,  $wAIC$  equals .33 for all three models.

### 238 **Simulations**

239 In order to provide hypotheses for EEG data, 27 simulations of the full Sync model were  
240 performed. For all simulations, the same parameter values were used. These parameter values were  
241 sampled from the estimated parameter distributions of the bSync model so that overall accuracy of  
242 model simulations ( $M = 78.00\%$ ,  $SD = 1.30$ ) closely resembled accuracy of subjects ( $M = 76.80\%$ ,  $SD$   
243  $= 4.91$ ). This resulted in a Mapping learning rate ( $\alpha$ ) of .8, a Switch learning rate ( $\alpha_{high}$ ) of .1 and a  
244 Cumulation parameter ( $\gamma$ ) of .3. The full Sync model did not use a Temperature ( $\tau$ ) parameter but the  
245 synchronization procedure introduces noise which also introduces some randomness in behavior. The

246 Switch threshold was always fixed to .5. Since the current model does not provide RTs, a period of 500  
247 ms was used as trial period in which the visual layer received stimulation. Thereafter, 1500 ms of inter-  
248 trial interval was simulated in order to provide a post-feedback period that could be analyzed in the  
249 same way as the empirical data. All other aspects of the task, such as the frequency and timing of rule  
250 switches, were the same for the model as for the human subjects.

### 251 *Power Analyses*

252 Time-frequency decomposition was performed on the excitatory neuron within the neuronal  
253 triplet of the model's pMFC node in the model. Complex Morlet wavelets were used for frequencies  
254 between 2 and 48 Hz defined in 25 logarithmically spaced steps. For each frequency, between 3 and 8  
255 cycles were used, also defined in 25 logarithmically spaced steps. Power was extracted as the squared  
256 absolute value of the time-frequency decomposed signal. In order to locate activity that was specific to  
257 feedback processing, the difference between power in trials with negative feedback and trials with  
258 positive feedback was computed. For simplicity, we selected the 2.5% most positive values as cluster  
259 of interest. This cluster contained one group of data points in theta frequency and approximately 250-  
260 500 ms after feedback. On every trial, the mean power in this cluster was computed and entered in the  
261 consecutive analyses. Since a negative prediction error in the model increases activity of the pMFC, we  
262 performed a linear regression of cluster power with prediction error as the independent variable. To test  
263 our first hypothesis, that this relationship was specific to negative prediction error, a second regression  
264 model was used that also included the interaction between prediction error and reward. The second  
265 hypothesis states that because negative prediction errors are strongest at the moment of a rule switch, a  
266 peak of post-feedback theta power should be found when we lock data to rule switches. To investigate  
267 this, we extracted power from the model cluster in trials within a 31-trial window around the rule switch  
268 (-15 to +15). The time course (one data point for each of the 31 trials) that resulted after averaging over  
269 all (15) rule switches and all (27) simulations, was then used as a regressor in a linear regression with  
270 data from the empirical clusters.

### 271 *Phase Analyses*

272 Our third hypothesis stated that phase coupling between pMFC and model nodes in the  
273 Mapping unit was stronger after negative feedback. Specifically, theta power in the model pMFC  
274 increases after negative prediction error. When there is sufficient power in the pMFC, it will increase  
275 synchronization in the Mapping unit (posterior/lateral task-related regions, e.g., pre-motor or visual  
276 areas). For this purpose, the pMFC uses binding by random bursts (Verguts, 2017). Here, the pMFC  
277 will at specific phases, send bursts to the Mapping unit. Thereby it will shift the phase of neurons in the  
278 Mapping unit (see Verbeke & Verguts, 2019 for details). This leads to phase shifts in these lower pre-  
279 motor or visual task-related areas, and a short period of phase-alignment between these task-related  
280 areas in the Mapping unit and pMFC. Phase was extracted in all model nodes by taking the angle of the  
281 Hilbert transform of the raw signal. For simplicity the model was implemented without inter-areal  
282 delays. Furthermore, in contrast to analyses on the empirical EEG data (see equation (10)), control for  
283 volume conduction was not needed, so the regular phase locking value (PLV; Lachaux, Rodriguez,  
284 Martinerie, & Varela, 1999) was computed between the model pMFC and the nodes in the motor layer  
285 of the Mapping unit. This PLV was then averaged over all 4 motor nodes and the time period included  
286 in the power cluster (~250-500 ms post feedback).

## 287 **EEG Analyses**

### 288 *Preprocessing*

289 The data were re-referenced offline to the average of the mastoid electrodes. Breaks or other  
290 offline periods were manually removed. Particularly noisy electrodes were interpolated between  
291 neighboring electrodes on all timesteps. For three subjects one electrode was interpolated, for another  
292 three subjects we had to interpolate two electrodes; because of a bridge, one subject needed interpolation  
293 for five posterior electrodes. Additionally, activity was band-pass filtered between 1 and 48 Hz in order  
294 to remove slow drifts and line noise of 50 Hz. Eyeblinks and other motor-related noise components  
295 were removed through EEGLAB independent component analysis (ICA). After ICA-removal, the data  
296 was epoched, once locked to feedback onset and once to stimulus onset. The epochs based on stimulus  
297 onset were used to extract baseline activation, which was -1500 to -500 ms relative to stimulus onset.  
298 This baseline activity was subtracted from all epochs. After epoching, on average 7.5% of epochs were

299 removed by applying an amplitude threshold of -500 to 500 mV and an improbability test with 6  
300 standard deviations for single electrodes and 2 standard deviations for all electrodes, as described in  
301 Makoto's preprocessing pipeline (Makoto, 2018). Before time-frequency analyses, data was also  
302 downsampled to 512 Hz.

### 303 *Time-frequency Decomposition*

304 Time-frequency decomposition was based on code from (Cohen, 2014). Similar to model  
305 analyses, complex Morlet wavelets were used for frequencies between 2 and 48 Hz defined in 25  
306 logarithmically spaced steps. For each frequency, between 3 and 8 cycles were used, also defined in 25  
307 logarithmically spaced steps.

### 308 *Power Computation*

309 A baseline correction was applied to the power estimates for each subject, electrode and  
310 frequency separately, based on the average baseline activity (-1500 ms to -500 ms from stimulus onset)  
311 across all 480 trials. Finally, the baseline-corrected data underwent a decibel conversion. Before final  
312 analyses, also trials with late responses were removed from the data.

### 313 *Power Cluster Analyses*

314 Similar to model analyses, we were interested in activity selective for feedback. Hence, a  
315 contrast between Z-scored power in trials with negative feedback and trials with positive feedback was  
316 computed. On these values, a non-parametric clustering procedure was applied (Maris & Oostenveld,  
317 2007). The distribution of statistics was computed. On each side of the distribution (two-sided test), the  
318 1% most extreme values were entered into the clustering analysis. From these, we clustered adjacent  
319 neighbors in the channel, frequency and time domains. To calculate our cluster-level statistic, we  
320 multiplied the number of items (i.e., (channel, frequency, time) points) in the cluster with the largest  
321 statistic of that cluster. A significance threshold of 5% was imposed on the subsequent non-parametric  
322 permutation test with 1000 iterations. Clusters that survived this permutation test were taken into the  
323 consecutive analyses. As an exploratory analysis, we also extracted mean cluster statistics for each  
324 subject, and ran a Spearman rank correlation of these statistics with wAIC of the bSync model obtained  
325 in the behavioral model fitting procedure.



### 326 ***Midfrontal Theta Power and Prediction Error***

327           The Sync model uniquely yields specific EEG predictions, to which we now turn. To test the  
328 first model-driven EEG hypothesis of a relation between theta power and prediction errors, we first  
329 extracted a measure of prediction error for every subject on every trial by simulating the bSync model.  
330 This measure of prediction error was then used in a linear mixed effects models as a predictor for the  
331 mean Z-scored power of every cluster that was selective for feedback. Here, a random intercept for  
332 every subject was included and a fixed slope. Because the Sync model predicted different relationships  
333 for positive prediction errors and negative prediction errors, also the interaction between prediction  
334 errors and reward was tested. Additionally, in order to explore whether the wAIC influenced the  
335 interaction between prediction errors and reward, also a three-way interaction between prediction error,  
336 reward and wAIC was tested. More specifically, three regression models were fitted: One in which only  
337 prediction error was included as regressor, one in which both prediction error and the interaction  
338 between prediction error and reward were included, and finally a third model in which the main effect,  
339 the two-way interaction, and an extra three-way interaction between prediction error, reward and wAIC  
340 was included. These regression models were then compared via ANOVA.

### 341 ***Rule Switch Locking***

342           A second model-driven EEG hypothesis considers theta power locked to the moment of a rule  
343 switch. For this analysis, EEG data of 31 trials around the rule switch (-15 to +15 trials, including the  
344 rule switch trial itself) were extracted. On these trials, the mean power for every cluster selective for  
345 feedback was computed. This data was then again averaged over all switches, giving us a trial-to-trial  
346 time course of mean cluster-power from -15 trials before rule switch to 15 trials after rule switch for  
347 every subject. On each time point, a 99.84% confidence interval (CI) was computed based on a  
348 Bonferroni correction for multiple comparisons ( $100-(5/31)$ ). This confidence interval was compared  
349 to a baseline power. Baseline power was computed based on the mean power in this cluster, averaged  
350 over all trials that were more than 15 trials removed from the rule switch.

351           As the rule switch trial, we considered both the actual rule switch and the subjective indication  
352 of a rule switch. Hence, power close to a rule switch was compared with the mean power of trials that

353 were far from the rule switch. When the confidence interval did not include the baseline value, power  
354 on this trial was considered as significantly deviating from baseline. Additionally, we aimed to  
355 investigate the similarity between the data pattern predicted by the model and the empirical data. For  
356 this purpose, data from the model simulations (see above for details) was used as a linear regressor for  
357 the empirical data. Also for this hypothesis, an extra analysis was performed to investigate whether  
358 wAIC had an influence on the observed effect. Here, we extracted subject data on trials of which cluster  
359 power significantly deviated from baseline and used this data as a dependent variable in a linear  
360 regression with wAIC.

### 361 *Midfrontal-posterior Phase-coupling Analyses*

362 For the third model-driven EEG hypothesis, we considered all midline electrodes (10) as seed  
363 and other electrodes (54) as receiver in the phase connectivity analyses. Because we were interested in  
364 phase-locking related to rule modules conveying the correct response, all data was lateralized with  
365 respect to the correct response. All data ipsi-lateral to the correct response was brought to the left  
366 electrodes; all contra-lateral data was brought to the right electrodes. The iPLV (Bruña, Maestú, &  
367 Pereda, 2018) was computed between all midline electrodes and all lateral electrodes for every time  
368 point in the feedback-locked data. This iPLV measure was computed by the following equation

369

$$iPLV = \left| \frac{1}{n} \sum_{t=1}^n \text{Im}(e^{-i(\Delta\phi_t)}) \right| \quad (10)$$

370

371 which computes the average phase angle ( $\phi$ ) difference over trials ( $t$ ). By only looking at the imaginary  
372 (Im) part of this phase angle difference, phase differences of zero are eliminated. Hence volume  
373 conduction effects are excluded, because such volume conduction effects are represented in zero-phase  
374 differences (Bruña et al., 2018; Nolte et al., 2004). Again, a non-parametric cluster algorithm was  
375 performed on the contrast between iPLV for trials with negative versus positive feedback. For this  
376 analysis, only data of one midline electrode was used. More specifically, we checked on which of the  
377 10 midline electrodes the mean contrast in the theta frequency (4-8 Hz) reached a maximum. This was

378 in the FCz electrode, hence only iPLV between FCz and all lateral electrodes were entered in the  
379 clustering algorithm. As for power, an exploratory analysis was performed in which we extracted mean  
380 cluster statistics for each subject, and ran a Spearman rank correlation of these statistics with wAIC of  
381 the bSync model obtained in the model fitting procedure.

## 382 **Results**

### 383 **Behavioral Data**

384 A paired t-test confirmed that there were no significant differences between the experiment  
385 block in which subjects had to indicate when a task switch happened or when they did not have to  
386 indicate this (see Materials and Methods for details), neither in accuracy ( $t(26) = .029, p = .977$ ), nor in  
387 RT ( $t(26) = -1.290, p = .208$ ).

### 388 **Model Analyses**

389 The distribution of all fitted parameter values for each model is given in Fig 2A. Simulations  
390 of the models with these parameter values allowed us to estimate a learning curve that illustrates how  
391 accuracy increases after rule switches (Fig 2B). Goodness of fit measures are summarized in Table 1.  
392 Here, log-likelihood was highest (best) for the bSync model, lowest for the ALR model, with the RW  
393 model in between. When a penalty for model complexity was applied (AIC, wAIC), the RW and bSync  
394 models performed approximately equal. Importantly, wAIC results indicated significant differences  
395 across individuals. As illustrated in Fig 2C, subjects could be roughly divided into three groups based  
396 on the wAIC of the bSync model. In one group (8 subjects), the wAIC were significantly smaller (better)  
397 for the bSync model ( $M = .12, SD = .026$ ) than for the RW model ( $M = .78, SD = .027$ ). A second group  
398 (7 subjects) showed wAIC values that were approximately equally strong for the bSync ( $M = .44, SD =$   
399  $.036$ ) as for the RW model ( $M = .50, SD = .032$ ). In a third group (12 subjects), the bSync model showed  
400 wAIC that were significantly higher for the bSync model ( $M = .64, SD = .027$ ) than for the RW model  
401 ( $M = .32, SD = .026$ ).

| <b>Model</b> | <b>Mean LL</b> | <b>SD LL</b> | <b>Mean AIC</b> | <b>SD AIC</b> | <b>Mean wAIC</b> | <b>SD wAIC</b> |
|--------------|----------------|--------------|-----------------|---------------|------------------|----------------|
| <i>RW</i>    | -208.08        | .07          | 420.16          | .13           | .51              | .20            |
| <i>ALR</i>   | -209.31        | .05          | 424.63          | .10           | .05              | .02            |
| <i>bSync</i> | -206.35        | 1.11         | 420.70          | 2.22          | .44              | .22            |

402 **Table 1. Goodness of fit measures.** Results of log-likelihood (LL), AIC and wAIC computations over subjects  
403 are shown for each of three models. For LL and wAIC, high values indicate a better fit, while for AIC a low value  
404 indicates a good fit.

405

406 Three parameters of the bSync model showed a significant correlation with wAIC (Fig 2D).  
407 These parameters were the Switch learning rate ( $\rho = -.761, p < .001$ ), the Cumulation parameter ( $\rho$   
408  $= -.708, p < .001$ ), and the Temperature parameter ( $\rho = -.497, p = .008$ ). There was no significant  
409 correlation with the Mapping learning rate ( $\rho = -.145, p = .468$ ). Additionally, a correlation test  
410 between accuracy and wAIC revealed that the bSync model fitted significantly better for subjects with  
411 a lower accuracy ( $\rho = -.510, p = .007$ ).

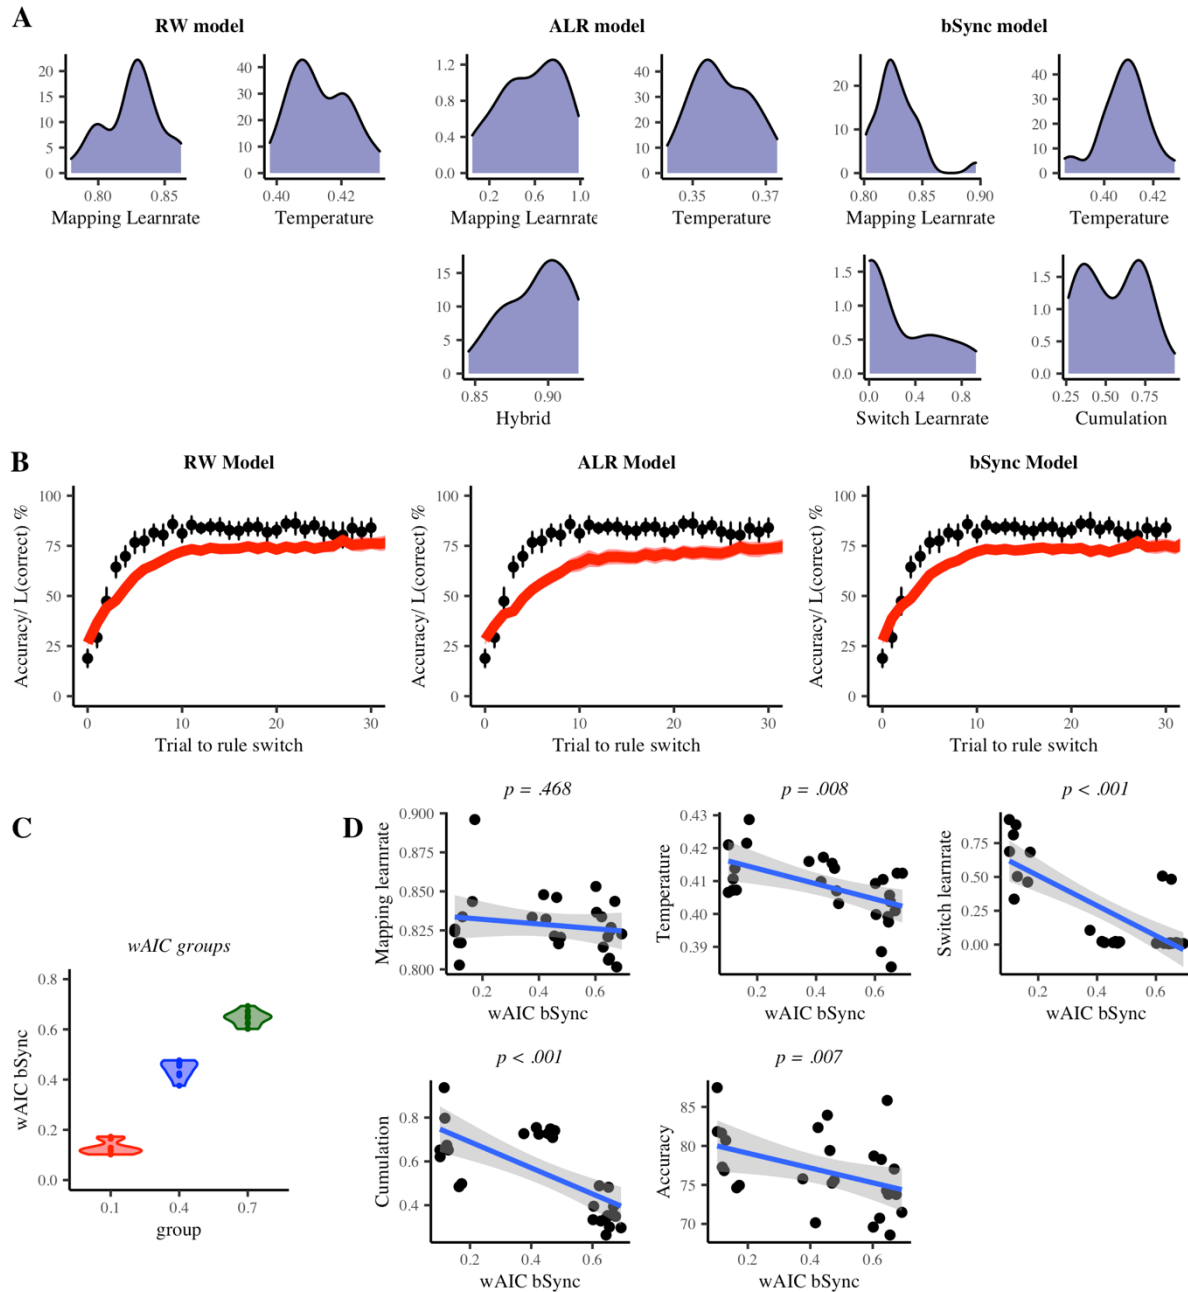

412

413 **Fig 2. Model comparison.** *A: Parameter distributions.* Distributions of fitted parameter values are shown for

414 each model. *B: Learning curve fit.* Black dots represent the mean accuracy data over all subjects. The error bars

415 show the 95% confidence intervals. The red line illustrates the mean Likelihood of data that was simulated with

416 the fitted parameter values. The shade represents the 95% confidence interval. *C: wAIC groups.* This figure

417 illustrates how wAIC values can be roughly divided in three groups (colors). *D: Correlation plots.* Correlations

418 are shown between wAIC of the bSync model and all parameters of the bSync model. In the lower middle plot,

419 also the correlation between wAIC and task accuracy is shown.

420

## 421 EEG and Model Data

### 422 Power Cluster Analyses

423 Cluster analysis on post-feedback power revealed three significant clusters that were selective  
424 for feedback processing (Fig 3). All three clusters appeared between 0 and 750 ms from feedback onset.  
425 As was predicted by the Sync model (Fig 3A), one of these clusters was in the theta frequency range (~  
426 4-8 Hz) and located on midfrontal electrodes (Fig 3B, D). This theta cluster showed more power when  
427 feedback was negative than when it was positive. Additionally, we found two clusters located on the  
428 posterior channels. One of these clusters was in the delta frequency (< 4 Hz; Fig 3B, E), the other cluster  
429 was located in the alpha-frequency range (~ 8-15 Hz; Fig 3B, C). Both the delta and alpha cluster  
430 showed less power for negative feedback than for positive feedback. No correlation between the power  
431 contrast of a cluster and subjects' wAIC for the bSync reached significance.

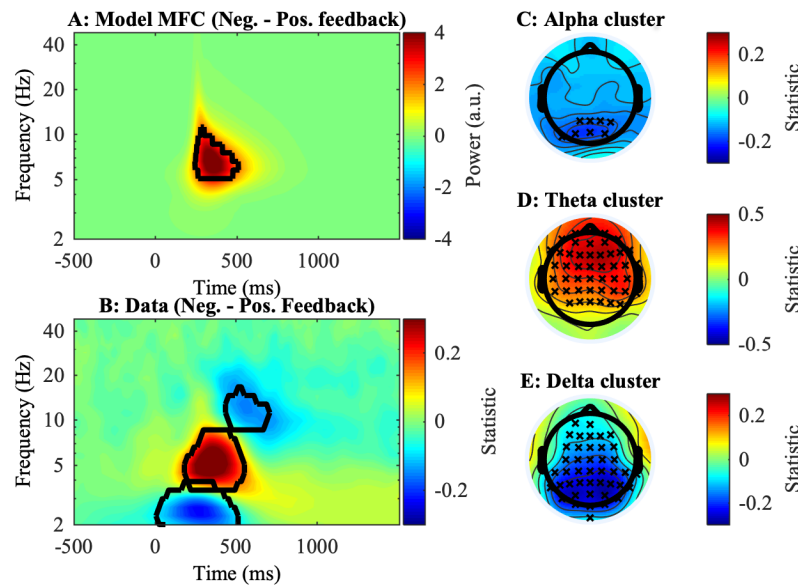

432 **Fig 3. Power results.** A-B: Time-Frequency plots of contrast (Negative – Positive feedback). Significant clusters  
433 are indicated by the black contour line. A: Contrast of power in the model pMFC. B: Contrast for Z-scored power  
434 in the human data, averaged over all 64 electrodes. C-E: topographical plots of clusters found in the human data.  
435 Crosses indicate channels where the cluster statistic reached significance.

437

### 438 Midfrontal Theta Power and Prediction Error

439 We next consider the first of three model-driven EEG hypotheses. We first perform statistical  
440 analysis on the Sync-model simulated data (Fig. 4A). Theta power in the Sync model data was best

441 predicted by the regression model that included an interaction between reward and prediction error ( $F(1,$   
442  $11980) = 22133, p < .001$ ). Hence, there was a significant main effect of prediction error ( $F(1, 11980)$   
443  $= 742962, p < .001, \beta = -4.99$ ) and a significant interaction of prediction error and reward ( $F(1, 11980)$   
444  $= 22133, p < .001, \beta = 4.48$ ). Thus, as predicted, the model cluster showed a negative linear relationship  
445 with negative prediction error, and no linear relationship with positive prediction error (Fig 4A).

446 For power in the empirical theta cluster, the regression model including the interaction  
447 between prediction error and reward fitted significantly better than the regression model with only  
448 prediction error as regressor ( $\chi^2(1, N = 27) = 110, p < .001$ ). Additionally, the regression model  
449 including the three-way interaction between prediction error, reward and wAIC fitted significantly  
450 better than the regression model with only the two-way interaction ( $\chi^2(2, N = 27) = 20.74, p < .001$ ).  
451 Here, all effects reached significance. Hence, there was a main effect of prediction error ( $\chi^2(1, N = 27)$   
452  $= 1299, p < .001, \beta = -.79$ ) and an interaction of prediction error with reward ( $\chi^2(1, N = 27) = 110, p <$   
453  $.001, \beta = .65$ ). Additionally, there was a significant interaction between prediction error, reward and  
454 wAIC ( $\chi^2(2, N = 27) = 20.900, p < .001$ ). As can be observed in Fig 4B these results indicated a  
455 significant negative linear relationship between power and negative prediction error, which was  
456 stronger for subjects with a high wAIC (i.e., better behavioral fit of the Sync model); and an absence of  
457 linear relationship between power and positive prediction error which did not differ significantly for  
458 wAIC (Fig 4B). Interestingly, the three-way interaction was significant in the unrewarded (negative  
459 prediction error) trials ( $\beta = -.89, p < .001$ ) but did not reach significance in the rewarded (positive  
460 prediction error) trials ( $\beta = .44, p = .077$ ).

461 For exploratory purposes, we investigated the same regression models in the delta and alpha  
462 clusters. In the delta cluster, the difference in regression model fit between the regression models  
463 without and with the prediction error-reward interaction term did not reach significance ( $\chi^2(1, N = 27)$   
464  $= 3.490, p = .062$ ). However, the regression model that also included the three-way interaction between  
465 prediction error, reward and wAIC fitted significantly better than the regression model with no

466 interaction terms ( $\chi^2(3, N = 27) = 9.27, p = .026$ ). Here, the main effect of prediction error was  
467 significant ( $\chi^2(1, N = 27) = 5.80, p < .001, \beta = .45$ ). The interaction between prediction error and reward  
468 did not reach significance ( $\chi^2(1, N = 27) = 3.490, p = .062, \beta = -.07$ ). Also the three-way interaction  
469 term did not reach significance ( $\chi^2(2, N = 27) = 5.830, p = .054$ ). However, if the interaction was  
470 considered separately for rewarded trials ( $\beta = .61, p = .018$ ) and unrewarded trials ( $\beta = -.50, p = .033$ ),  
471 both reached significance. As can be observed in Fig 4C, this meant that there was a positive linear  
472 relationship between power and prediction error for both positive and negative prediction error (Fig  
473 4D). For subjects with low wAIC, the slope in unrewarded trials seemed similar to the one in rewarded  
474 trials, while for subjects with high wAIC, an inverse effect of the theta cluster was observed in which  
475 there was a flat(er) slope in unrewarded trials but a steeper slope in rewarded trials.

476 In the alpha cluster, the regression model with the two-way interaction term showed a  
477 significantly better fit than the regression model without interaction ( $\chi^2(1, N = 27) = 224, p < .001$ ).  
478 When the three-way interaction was added, it did not lead to a significantly better regression model ( $\chi^2$   
479  $(2, N = 27) = .35, p = .841$ ). Here, a significant main effect of prediction error ( $\chi^2(1, N = 27) = 142, p$   
480  $< .001, \beta = .85$ ) and a significant interaction between prediction error and reward ( $\chi^2(1, N = 27) = 226,$   
481  $p < .001, \beta = -1.38$ ) were observed. The three-way interaction between prediction error, reward and  
482 wAIC was not significant ( $\chi^2(2, N = 27) = .360, p = .833$ ). As is shown in Fig 4D, power in the alpha  
483 cluster exhibited a positive linear relationship for negative prediction error but a negative linear  
484 relationship with positive prediction error. These effects did not differ with respect to wAIC.



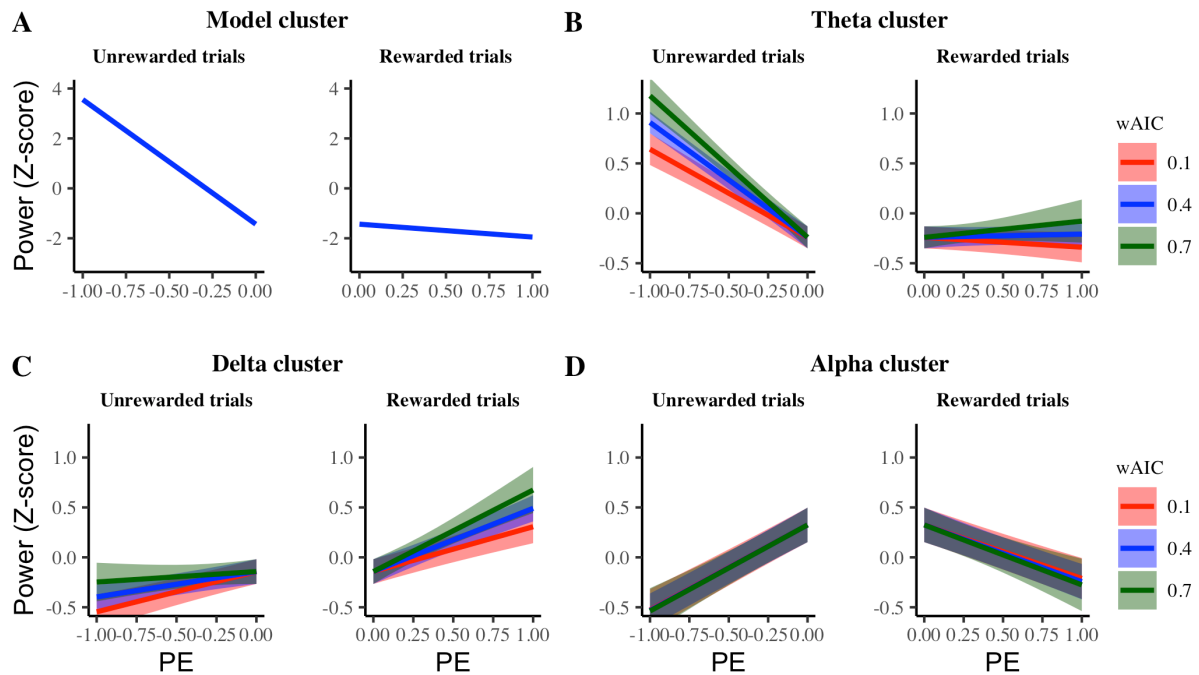

485

486 **Fig 4. Result of linear regression between power and prediction error (PE) in all clusters.** Lines indicate

487 slopes and the shades represent 95% confidence intervals. The Model cluster (A) aimed to predict empirical data

488 from the theta cluster (B).

489

#### 490 **Rule Switch Locking**

491 For the second model-driven EEG hypothesis, power from the data clusters was extracted in

492 trials within a 31-trial window from the rule switch (-15 to +15). In all clusters, one trial was observed

493 that significantly deviated from baseline power. In the theta cluster (Fig 5A), only the exact trial of the

494 rule switch (0) was significant above baseline (CI99.84 [-2.059, .256], *baseline* = -2.340). Linear

495 regression of the data time course (across 31 trials) on the Sync model time course showed a significant

496 effect ( $F(1, 835) = 20.510, p < .001, R^2_{adj} = .023, \beta = .31$ ). In the delta cluster (Fig 5B), only the exact

497 trial of the rule switch (0) was significantly below baseline (CI99.84 [-2.450, -1.265], *baseline* = -

498 1.201). Linear regression of the data time course on the Sync model time course revealed a significant

499 correlation ( $F(1, 835) = 7.360, p = .007, R^2_{adj} = .008, \beta = -.18$ ). For the alpha cluster (Fig 5C), again one

500 trial was significantly below baseline (CI99.84 [-6.275, -3.603], *baseline* = -3.584). Notably, this was

501 the trial after the rule switch (+1). Moreover, when data was locked to the moment where subjects

502 indicated the rule switch (Fig 5D), alpha power reaches a minimum at this exact moment (CI99.84 [-

503 7.675, -3.686], *baseline* = -3.584). Also in the alpha cluster, the linear regression of the power on the  
 504 Sync model pattern reached significance with a negative slope ( $F(1, 835) = 32.720, p < .001, R^2_{\text{adj}} =$   
 505 .037,  $\beta = -.65$ ).

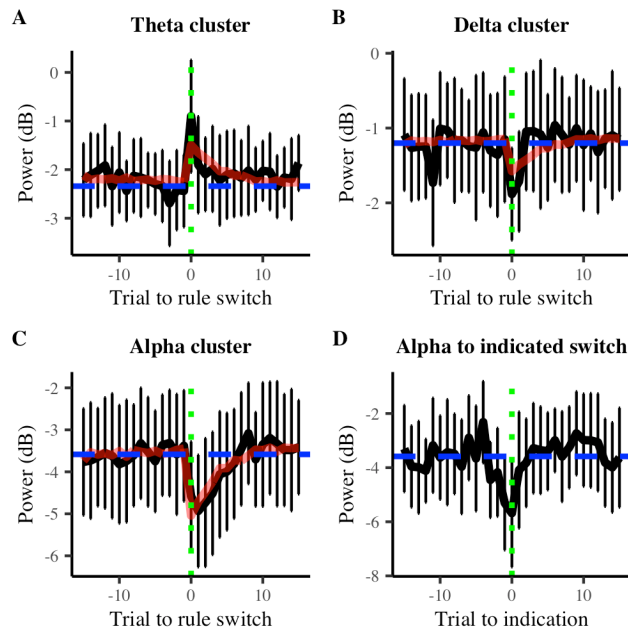

506  
 507 **Fig 5. Power locked to rule switch.** Black lines show the mean power. Error bars show the 99.84% confidence  
 508 interval (Bonferroni correction). The horizontal blue dashed line represents baseline power and the vertical green  
 509 dotted line indicates the moment of the rule switch. The red line visualizes the result of linear regression between  
 510 the Sync model and human data. A-C show data locked to the moment of the actual rule switch. D shows data of  
 511 the alpha cluster locked to the moment when subjects indicated they noticed the task switch.

512  
 513 Power at the peak trials (0 for theta and delta, +1 for alpha) was extracted and added to a linear  
 514 regression with wAIC as predictor. This revealed no significant effects for the theta ( $F(1, 25) = .004, p$   
 515  $= .948, R^2_{\text{adj}} = -.040, \beta = -.10$ ) or delta cluster ( $F(1, 25) = .680, p = .417, R^2_{\text{adj}} = -.012, \beta = .66$ ). However,  
 516 the effect of wAIC did reach significance in the alpha cluster ( $F(1, 25) = 7.220, p = .013, R^2_{\text{adj}} = .193, \beta$   
 517  $= 4.17$ ). Fig 6 sheds light on how activity in the alpha cluster differed depending on wAIC. For  
 518 illustrative purposes, subjects were divided in three groups of low, middle and high wAIC. For each  
 519 group, the data pattern of alpha activity was plotted, once locked to the real rule switch and once locked

520 to the indication of a rule switch (Fig 6). Here, it is observed that the alpha pattern is mainly driven by  
521 subjects that have a low wAIC (i.e., good fit) for the bSync model.

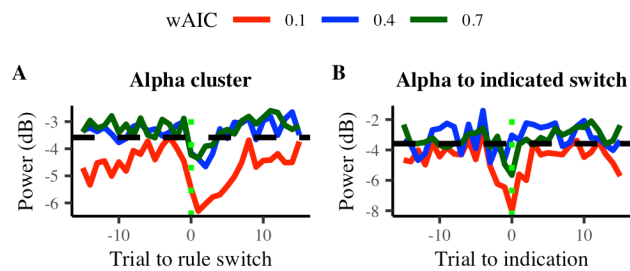

522

523 **Fig 6. Power locked to rule switch for different wAIC.** Data patterns are shown for different wAIC values  
524 (colored lines). The horizontal black dashed line shows the baseline power over all subjects and the vertical green  
525 dotted line indicates the moment of the rule switch (A) or indication of rule switch (B).

526

### 527 *Midfrontal-posterior Phase-coupling Analyses*

528 We next turn to our third model-driven EEG analysis concerning an increase of phase  
529 coupling between midfrontal and posterior electrodes after negative feedback. As previously described,  
530 this coupling is induced by bursts that are sent from pMFC to posterior areas in the Mapping unit. Since  
531 pMFC power is stronger after negative feedback, also the number of bursts and the amount of phase-  
532 coupling is increased.

533 Here, non-parametric cluster analyses on the phase-locking data (phase-locking with  
534 midfrontal electrodes; Fig 7) revealed six significant clusters that were selective for feedback (for details  
535 see Materials and Methods). These clusters were located in the theta (4; Fig 7A, B, C) or delta (2; Fig  
536 7A, B, D) frequency band. In the theta frequency band, two clusters were located at temporal electrodes;  
537 two other clusters were located on more lateral/anterior frontal electrodes. In the delta frequency band,  
538 both clusters were located on posterior electrodes. In line with the results of Sync model simulations  
539 (Fig 7E), the theta clusters showed an increase in phase-locking after negative feedback. This was the  
540 case for both the ipsilateral and contralateral electrodes. The delta clusters show the inverse pattern of  
541 the theta cluster. Here, phase-locking was stronger after positive feedback than after negative feedback  
542 in both the ipsi- and contralateral cluster. As in the power analyses, we also explored whether the phase-

543 locking contrast in each cluster correlated with the subjects' wAIC for the bSync model. None of these  
544 correlations reached significance.

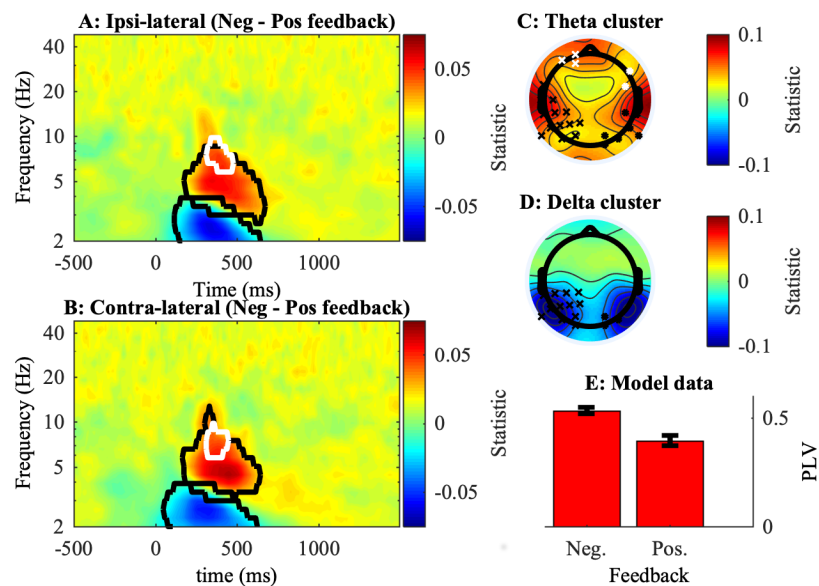

545  
546 **Fig 7. Phase-locking results.** A-B: Time-Frequency plots of contrast (Negative – Positive feedback). Significant  
547 clusters are indicated by the black or white contour line. The black line represents posterior clusters in C and D  
548 while the white line represent the frontal clusters in C. A: Contrast of iPLV averaged over all ipsi-lateral  
549 electrodes. B: Contrast of iPLV averaged over all contra-lateral electrodes. C-D: Topographical plots of clusters.  
550 Data was averaged over all time points and frequencies that were included in the respective contours of A and B.  
551 Channels where cluster statistic reached significance are marked by crosses or dots. The left channels (crosses)  
552 present ipsi-lateral electrodes and the right channels (dots) present contra-lateral electrodes. Again, the white color  
553 was used to distinguish the frontal clusters from the temporal clusters.

554

555

## Discussion

556

557

558

559

560

561

562

The current study aimed to gain insight in neural mechanisms that allow humans to flexibly adapt to changes in the environment. For this purpose, 27 healthy human subjects were tested on a probabilistic reversal learning task while EEG was recorded. On behavioral level, three models of increasing hierarchical complexity were compared. A first model, the RW model, updated the value of stimulus-action mappings on a trial-by-trial basis with a fixed learning rate. In a second model, the ALR model, this approach was extended by employing an adaptable learning rate, allowing the ALR model to be flexible in adapting to rule switches (fast learning rate) but to also be robust to noise evoked by

563 probabilistic feedback (slow learning rate). The third, Sync, model implemented modularity to retain  
564 task-specific mappings. It employs hierarchical learning to determine when to switch between rule  
565 modules. This approach obviates the need to relearn mappings on each rule switch. No evidence was  
566 found for the ALR model, while for some people the RW fit best, and for others the Sync model.

567         Simulations of the Sync model allowed formulation and testing of three model-driven EEG  
568 hypotheses. The first hypothesis considers the relation between midfrontal theta power and prediction  
569 errors. In the Sync model, prediction errors are used to evaluate how much control should be exerted.  
570 Here, the level of control is represented by theta power in pMFC. Since only negative prediction errors  
571 inform about possible rule switches, the Sync model increased control after negative prediction errors  
572 but not after positive prediction errors. Empirical data supported this hypothesis. A linear relationship  
573 between prediction error and power in the theta cluster was observed for unrewarded trials (negative  
574 prediction error) but not for rewarded trials (positive prediction error). Moreover, this effect was  
575 stronger for subjects that fitted better with the Sync model. Since prediction errors are strongest at the  
576 moment of a rule switch, a second model-driven hypothesis stated that theta power would peak at rule  
577 switches. Again, this hypothesis was supported by empirical data. Moreover, simulated power  
578 significantly predicted power in the empirical theta cluster. In a third model-driven hypothesis, the Sync  
579 model predicted that phase connectivity would be increased after negative feedback. Here, six  
580 significant clusters were found. Four of them were in theta frequency range and showed the pattern  
581 predicted by the Sync model. Two of these clusters were located on posterior-temporal electrodes,  
582 which is roughly in line with our prediction of motor and visual areas.

583         Several hypotheses remain to be tested. First, as was briefly mentioned in the Materials and  
584 Methods section, previous modeling work used a gamma frequency in the Mapping unit instead of a  
585 theta frequency. This frequency was currently changed because empirical work provides strong  
586 evidence for within-frequency (theta-theta) coupling (Cavanagh, Cohen, & Allen, 2009; Clouter,  
587 Shapiro, & Hanslmayr, 2017; Nigbur, Cohen, Ridderinkhof, & Stürmer, 2011) during cognitive tasks,  
588 in addition to cross-frequency coupling. We thus also studied within-frequency coupling empirically.  
589 Nevertheless, future work, using MEG or more invasive measurements, should also study the role of

590 cross-frequency (theta-gamma) coupling. Second, the limited spatial resolution of EEG did not allow  
591 testing the prediction that different task rules are implemented by synchronizing different task-relevant  
592 modules.

593         Several extensions can be made to the model as well. For instance, while for the reversal  
594 learning task of the current study it was sufficient to use prediction error to determine when to make a  
595 binary switch, a more sophisticated approach might apply in everyday life, where contextual cues allow  
596 navigating a vast map of tasks and rules. One way to address this issue is by adding second level  
597 (contextual) features which allow the LFC to (learn to) infer which of multiple task modules should be  
598 synchronized. Additionally, scalability of the Sync model is limited by how modularity was  
599 implemented in the Mapping unit. Here, none of the task rule 1 mappings are shared with task rule 2.  
600 Such a strict division of task mappings is optimal when those mappings are orthogonal. However, when  
601 some (but not all) of the mappings can be generalized between tasks, the current approach does not  
602 allow agents to transfer knowledge across contexts. As has been addressed in previous work (Collins  
603 & Frank, 2013; Gershman, Blei, & Niv, 2010), a more sustainable way is to construct modules of  
604 mappings that are shared between tasks. Instead of having to learn each new task from scratch, this  
605 approach allows agents to transfer knowledge from one task to another. Future work should explore  
606 whether these more complex hierarchical learning algorithms can be integrated in the Sync model.

607         Since the current task did not contain (contextual) cues to infer the appropriate mappings, the  
608 Sync model relied on prediction errors to estimate the hidden state (task rule) of the environment. This  
609 is in line with previous ideas that reinforcement learning and more specifically prediction errors  
610 signaled by dopamine are used to infer so called belief states (Gershman & Uchida, 2019; Starkweather,  
611 Babayan, Uchida, & Gershman, 2017; Wilson et al., 2014). Instead, non-hierarchical models (such as  
612 RW and ALR) only use prediction errors to adjust value of lower-level mappings.

613         Building on suggestions of previous work (Piray, Dezfouli, Heskes, Frank, & Daw, 2019),  
614 current study illustrated how individual differences in model fit can be leveraged to address cognitive  
615 questions. Here, three groups could be distinguished. One group of subjects aligned with the RW model,  
616 a second group aligned with the Sync model and in a third group, no distinction could be made between

617 the RW and Sync model. Interestingly, subjects with lower accuracy fitted better with the Sync model.  
618 This is consistent with previous work (Verbeke & Verguts, 2019) which illustrated that modularity as  
619 employed by the Sync model is only beneficial if the learning problem is sufficiently complex.  
620 Furthermore, despite previous work showing a good behavioral fit of ALR-type models (Bai et al.,  
621 2014; Behrens et al., 2007; Silvetti, Seurinck, & Verguts, 2013), fit of the ALR model in the current  
622 study was consistently low over all subjects. Crucially, previous studies typically included long stable  
623 trial blocks in which the task rule did not change. In these periods it was beneficial to decrease learning  
624 rate. In contrast, the current task applied frequent rule switches in rapid succession, favoring tonically  
625 high learning rates. Thus, future work should investigate whether subjects flexibly employ the RW,  
626 Sync or ALR framework depending on the structure and complexity of the task.

627         The Sync model implements modularity via neural oscillations between task-relevant areas.  
628 This concurs with a growing interest in the function of neural oscillations for a wide variety of  
629 cognitive functions, such as visual attention (e.g., Gray & Singer, 1989; Han, Lee, & Choi, 2019;  
630 Jensen, Bonnefond, & VanRullen, 2012), working memory (e.g., Hsieh, Ekstrom, & Ranganath, 2011;  
631 Hsieh & Ranganath, 2014; Lisman & Idiart, 1995), cognitive control (e.g., Cavanagh & Frank, 2014;  
632 Oehr et al., 2014) and declarative learning (Ergo, De Loof, & Verguts, 2020). According to the BBS  
633 hypothesis (Fries, 2005, 2015), all these cognitive functions require in some way the binding of several  
634 stimuli, dimensions or features. Current work described how oscillations, and more specifically  
635 synchronization, might be relevant in hierarchical learning. Here, BBS is employed to flexibly bind  
636 mappings that are relevant for a certain task rule.

637         On anatomical-functional level, current work builds on suggestions from previous work that  
638 pMFC closely cooperates with LFC (Cavanagh, Frank, Klein, & Allen, 2010; Kondo, Osaka, & Osaka,  
639 2004; Mac Donald, Cohen, Stenger, & Carter, 2000) to exert hierarchical control over lower-level motor  
640 processes (Alexander & Brown, 2015; Badre & Nee, 2018; Holroyd & McClure, 2015; Koechlin, Ody,  
641 & Kouneiher, 2003). In the Sync model, LFC signals which rule modules should be synchronized. This  
642 is in line with previous theoretical work describing LFC as containing task demands (Botvinick et al.,  
643 2001) and empirical work that found strong communication between LFC and pMFC in cognitive tasks  
644 (Cavanagh et al., 2010; Kondo et al., 2004; Mac Donald et al., 2000). Also in line with previous



645 empirical work (Boorman, Behrens, Woolrich, & Rushworth, 2009; Wilson et al., 2014), the model  
646 aMFC is responsible for keeping track of the relevant task rule. Additionally, consistent with previous  
647 fMRI work (e.g., Aben, Calderon, den Bussche, & Verguts, 2020; Hare, Schultz, Camerer, O’Doherty,  
648 & Rangel, 2011), the current study also found increased coupling between midfrontal cortex and task-  
649 related areas when more control was needed (negative feedback). Importantly, while this fMRI work  
650 showed detailed networks of connectivity, current study described how this connectivity works at  
651 algorithmic level.

652 To sum up, we have demonstrated how the brain might employ synchronization in order to  
653 bind task-relevant areas for hierarchical and efficient task processing. To achieve this, we used a  
654 combination of EEG, computational modelling, individual differences, and behavioral analysis. We  
655 believe that such an approach might reveal how and whether more complicated tasks can be  
656 implemented via synchronization as well, in which contexts, and in which individuals.

## 657 **References**

- 658 Aben, B., Calderon, C. B., Van den Bussche, E., & Verguts, T. (2020). Cognitive effort modulates  
659 connectivity between dorsal anterior cingulate cortex and task-relevant cortical areas. *The*  
660 *Journal of Neuroscience*, *40*(19), JN-RM-2948-19. [https://doi.org/10.1523/jneurosci.2948-](https://doi.org/10.1523/jneurosci.2948-19.2020)  
661 [19.2020](https://doi.org/10.1523/jneurosci.2948-19.2020)
- 662 Alexander, W. H., & Brown, J. W. (2015). Hierarchical error representation: A computational model  
663 of anterior cingulate and dorsolateral prefrontal cortex. *Neural Computation*, *27*(11), 2354–  
664 2410. <https://doi.org/10.1162/NECO>
- 665 Badre, D., & Nee, D. E. (2018). Frontal cortex and the hierarchical control of behavior. *Trends in*  
666 *Cognitive Sciences*, *22*(2), 170–188. <https://doi.org/10.1016/j.tics.2017.11.005>
- 667 Bai, Y., Katahira, K., & Ohira, H. (2014). Dual learning processes underlying human decision-making  
668 in reversal learning tasks: Functional significance and evidence from the model fit to human  
669 behavior. *Frontiers in Psychology*, *5*(AUG), 1–8. <https://doi.org/10.3389/fpsyg.2014.00871>
- 670 Behrens, T. E. J., Woolrich, M. W., Walton, M. E., & Rushworth, M. F. S. (2007). Learning the value  
671 of information in an uncertain world. *Nature Neuroscience*, *10*(9), 1214–1221.



- 672 <https://doi.org/10.1038/n1954>
- 673 Boorman, E. D., Behrens, T. E. J., Woolrich, M. W., & Rushworth, M. F. S. (2009). How green is the  
674 grass on the other side? frontopolar cortex and the evidence in favor of alternative courses of  
675 action. *Neuron*, 62(5), 733–743. <https://doi.org/10.1016/j.neuron.2009.05.014>
- 676 Botvinick, M., Braver, T. S., Barch, D. M., Carter, C. S., Cohen, J. D., & Cameron, C. S. (2001).  
677 Conflict monitoring and cognitive control. *Psychological Review*, 108(3), 624–652.  
678 <https://doi.org/10.1037/0033-295X.108.3.624>
- 679 Bruña, R., Maestú, F., & Pereda, E. (2018). Phase locking value revisited: Teaching new tricks to an  
680 old dog. *Journal of Neural Engineering*, 15(5). <https://doi.org/10.1088/1741-2552/aacfe4>
- 681 Cavanagh, J. F., Cohen, M. X., & Allen, J. J. B. B. (2009). Prelude to and resolution of an error : EEG  
682 phase synchrony reveals cognitive control dynamics during action monitoring. *Journal of*  
683 *Neuroscience*, 29(1), 98–105. <https://doi.org/10.1523/JNEUROSCI.4137-08.2009>
- 684 Cavanagh, J. F., & Frank, M. J. (2014). Frontal theta as a mechanism for cognitive control. *Trends in*  
685 *Cognitive Sciences*, 18(8), 414–421. <https://doi.org/10.1016/j.tics.2014.04.012>
- 686 Cavanagh, J. F., Frank, M. J., Klein, T. J., & Allen, J. B. (2010). Frontal theta links prediction errors  
687 to behavioral adaptation in reinforcement learning. *NeuroImage*, 49(4), 3198–3209.  
688 <https://doi.org/10.1016/j.neuroimage.2009.11.080>
- 689 Clouter, A., Shapiro, K. L., & Hanslmayr, S. (2017). Theta phase synchronization is the glue that  
690 binds human associative memory. *Current Biology*, 27(20), 1–6.  
691 <https://doi.org/10.1016/j.cub.2017.09.001>
- 692 Cohen, M. X. (2014). *Analyzing neural time series data: Theory and practice*. Cambridge,  
693 Massachusetts: The MIT Press.
- 694 Collins, A. G. E., & Frank, M. J. (2013). Cognitive control over learning: Creating, clustering, and  
695 generalizing task-set structure. *Psychological Review*, 120(1), 190–229.  
696 <https://doi.org/10.1037/a0030852>
- 697 Cools, R., Clark, L., Owen, A. M., & Robbins, T. W. (2002). Defining the neural mechanisms of  
698 probabilistic reversal learning using event-related functional magnetic resonance imaging. *The*

- 699 *Journal of Neuroscience : The Official Journal of the Society for Neuroscience*, 22(11), 4563–  
700 4567. <https://doi.org/20026435>
- 701 Delorme, A., & Makeig, S. (2004). EEGLAB: An open source toolbox for analysis of single-trial  
702 EEG dynamics including independent component analysis. *Journal of Neuroscience Methods*,  
703 134(1), 9–21. <https://doi.org/10.1016/j.jneumeth.2003.10.009>
- 704 Ergo, K., De Loof, E., & Verguts, T. (2020). Reward prediction error and declarative memory. *Trends*  
705 *in Cognitive Sciences*, 24(5), 388–397. <https://doi.org/10.1016/j.tics.2020.02.009>
- 706 French, R. M. (1999). Catastrophic forgetting in connectionist networks. *Trends in Cognitive*  
707 *Sciences*, 6613(April), 128–135.
- 708 Fries, P. (2005). A mechanism for cognitive dynamics: neuronal communication through neuronal  
709 coherence. *Trends in Cognitive Sciences*, 9(10), 474–480.  
710 <https://doi.org/10.1016/j.tics.2005.08.011>
- 711 Fries, P. (2015). Rhythms for cognition: Communication through coherence. *Neuron*, 88(1), 220–235.  
712 <https://doi.org/10.1016/j.neuron.2015.09.034>
- 713 Gershman, S. J., Blei, D. M., & Niv, Y. (2010). Context, learning, and extinction. *Psychological*  
714 *Review*, 117(1), 197–209. <https://doi.org/10.1037/a0017808>
- 715 Gershman, S. J., & Uchida, N. (2019). Believing in dopamine. *Nature Reviews Neuroscience*, 20(11),  
716 703–714. <https://doi.org/10.1038/s41583-019-0220-7>
- 717 Gray, C. M., & Singer, W. (1989). Stimulus-specific neuronal oscillations in orientation columns of  
718 cat visual cortex. *Proceedings of the National Academy of Sciences of the United States of*  
719 *America*, 86(5), 1698–1702. <https://doi.org/10.1073/pnas.86.5.1698>
- 720 Han, H. B., Lee, K. E., & Choi, J. H. (2019). Functional dissociation of  $\theta$  oscillations in the frontal  
721 and visual cortices and their long-range network during sustained attention. *ENeuro*, 6(6), 1–12.  
722 <https://doi.org/10.1523/ENEURO.0248-19.2019>
- 723 Hare, T. A., Schultz, W., Camerer, C. F., O’Doherty, J. P., & Rangel, A. (2011). Transformation of  
724 stimulus value signals into motor commands during simple choice. *Proceedings of the National*  
725 *Academy of Sciences of the United States of America*, 108(44), 18120–18125.

- 726 <https://doi.org/10.1073/pnas.1109322108>
- 727 Holroyd, C. B. (2016). The waste disposal problem of effortful control. In T. S. Braver (Ed.),  
728 *Motivation and cognitive control* (pp. 235–260). Hove, UK: Psychology Press.
- 729 Holroyd, C. B., & McClure, S. M. (2015). Hierarchical control over effortful behavior by rodent  
730 medial frontal cortex: A computational model. *Psychological Review*, *122*(1), 54–83.  
731 <https://doi.org/10.1037/a0038339>
- 732 Hsieh, L. T., Ekstrom, A. D., & Ranganath, C. (2011). Neural oscillations associated with item and  
733 temporal order maintenance in working memory. *Journal of Neuroscience*, *31*(30), 10803–  
734 10810. <https://doi.org/10.1523/JNEUROSCI.0828-11.2011>
- 735 Hsieh, L. T., & Ranganath, C. (2014). Frontal midline theta oscillations during working memory  
736 maintenance and episodic encoding and retrieval. *NeuroImage*, *85*, 721–729.  
737 <https://doi.org/10.1016/j.neuroimage.2013.08.003>
- 738 Izquierdo, A., Brigman, J. L., Radke, A. K., Rudebeck, P. H., & Holmes, A. (2017). The neural basis  
739 of reversal learning: An updated perspective. *Neuroscience*, *345*, 12–26.  
740 <https://doi.org/10.1016/j.neuroscience.2016.03.021>
- 741 Jasper, H. (1958). The ten twenty electrode system of the international federation.  
742 *Electroencephalogr. Clin. Neurophysiol.*, (10), 371–375.
- 743 Jensen, O., Bonnefond, M., & VanRullen, R. (2012). An oscillatory mechanism for prioritizing salient  
744 unattended stimuli. *Trends in Cognitive Sciences*, *16*(4), 200–205.  
745 <https://doi.org/10.1016/j.tics.2012.03.002>
- 746 Koechlin, E., Ody, C., & Kouneiher, F. (2003). The architecture of cognitive control in the human  
747 prefrontal cortex. *Science (New York, NY)*, *302*(5648), 1181–1185.  
748 <https://doi.org/10.1126/science.1088545>
- 749 Kondo, H., Osaka, N., & Osaka, M. (2004). Cooperation of the anterior cingulate cortex and  
750 dorsolateral prefrontal cortex for attention shifting. *NeuroImage*, *23*(2), 670–679.  
751 <https://doi.org/10.1016/j.neuroimage.2004.06.014>
- 752 Lachaux, J. P., Rodriguez, E., Martinerie, J., & Varela, F. J. (1999). Measuring phase synchrony in

- 753 brain signals. *Human Brain Mapping*, 8(4), 194–208. [https://doi.org/10.1002/\(SICI\)1097-](https://doi.org/10.1002/(SICI)1097-)  
754 0193(1999)8:4<194::AID-HBM4>3.0.CO;2-C
- 755 Lisman, J. E., & Idiart, M. A. P. (1995). Storage of  $7 \pm 2$  short-term memories in oscillatory  
756 subcycles. *Science*, 267(5203), 1512–1515. <https://doi.org/10.1126/science.7878473>
- 757 Mac Donald, A. W., Cohen, J. D., Stenger, A. V., & Carter, C. S. (2000). Dissociating the role of the  
758 dorsolateral prefrontal and anterior cingulate cortex in cognitive control. *Science*, 288(June),  
759 1835–1838. <https://doi.org/10.1126/science.288.5472.1835>
- 760 Makoto, M. (2018). Makoto's preprocessing pipeline. Retrieved from  
761 [https://sccn.ucsd.edu/wiki/Makoto%27s\\_preprocessing\\_pipeline](https://sccn.ucsd.edu/wiki/Makoto%27s_preprocessing_pipeline)
- 762 Maris, E., & Oostenveld, R. (2007). Nonparametric statistical testing of EEG- and MEG-data. *Journal*  
763 *of Neuroscience Methods*, 164(1), 177–190. <https://doi.org/10.1016/j.jneumeth.2007.03.024>
- 764 Nigbur, R., Cohen, M. X., Ridderinkhof, K. R., & Stürmer, B. (2011). Theta dynamics reveal domain-  
765 specific control over stimulus and response conflict. *Journal of Cognitive Neuroscience*, 24(5),  
766 1264–1274. [https://doi.org/10.1162/jocn\\_a\\_00128](https://doi.org/10.1162/jocn_a_00128)
- 767 Nolte, G., Bai, O., Wheaton, L., Mari, Z., Vorbach, S., & Hallett, M. (2004). Identifying true brain  
768 interaction from EEG data using the imaginary part of coherency. *Clinical Neurophysiology*,  
769 115(10), 2292–2307. <https://doi.org/10.1016/j.clinph.2004.04.029>
- 770 Oehr, C. R., Hanslmayr, S., Fell, J., Deuker, L., Kremers, N. A., Do Lam, A. T., ... Axmacher, N.  
771 (2014). Neural communication patterns underlying conflict detection, resolution, and adaptation.  
772 *Journal of Neuroscience*, 34(31), 10438–10452. <https://doi.org/10.1523/JNEUROSCI.3099->  
773 13.2014
- 774 Peirce, J., Gray, J. R., Simpson, S., MacAskill, M., Höchenberger, R., Sogo, H., ... Lindeløv, J. K.  
775 (2019). PsychoPy2: Experiments in behavior made easy. *Behavior Research Methods*, 51(1),  
776 195–203. <https://doi.org/10.3758/s13428-018-01193-y>
- 777 Piray, P., Dezfouli, A., Heskes, T., Frank, M., & Daw, N. (2019). Hierarchical Bayesian inference for  
778 concurrent model fitting and comparison for group studies. *PLoS Computational Biology*, 15(6),  
779 34. <https://doi.org/https://doi.org/10.1371/journal.pcbi.1007043>

- 780 R Core Team. (2017). R: A Language and Environment for Statistical Computing. Vienna, Austria.
- 781 Rescorla, R. A., & Wagner, A. R. (1972). A theory of Pavlovian conditioning: Variations in the  
782 effectiveness of reinforcement and nonreinforcement. *Classical Conditioning II Current  
783 Research and Theory*, 21(6), 64–99. <https://doi.org/10.1101/gr.110528.110>
- 784 Saez, A., Rigotti, M., Ostojic, S., Fusi, S., & Salzman, C. D. (2015). Abstract context representations  
785 in primate amygdala and prefrontal cortex. *Neuron*, 87(4), 869–881.  
786 <https://doi.org/10.1016/j.neuron.2015.07.024>
- 787 Silvetti, M., Seurinck, R., & Verguts, T. (2011). Value and prediction error in medial frontal cortex:  
788 integrating the single-unit and systems levels of analysis. *Frontiers in Human Neuroscience*,  
789 5(August), 75. <https://doi.org/10.3389/fnhum.2011.00075>
- 790 Silvetti, M., Seurinck, R., & Verguts, T. (2013). Value and prediction error estimation account for  
791 volatility effects in ACC: A model-based fMRI study. *Cortex*, 49(6), 1627–1635.  
792 <https://doi.org/10.1016/j.cortex.2012.05.008>
- 793 Silvetti, M., Vassena, E., Abrahamse, E., & Verguts, T. (2018). Dorsal anterior cingulate-brainstem  
794 ensemble as a reinforcement meta-learner. *PLoS Computational Biology*, 14(8), 1–32.  
795 <https://doi.org/10.1371/journal.pcbi.1006370>
- 796 Springer, M., & Paulsson, J. (2006). Harmonies from noise. *Nature*, 439(January), 27–29.  
797 <https://doi.org/doi:10.1038/439027a>
- 798 Starkweather, C. K., Babayan, B. M., Uchida, N., & Gershman, S. J. (2017). Dopamine reward  
799 prediction errors reflect hidden-state inference across time. *Nature Neuroscience*, 20(4), 581–  
800 589. <https://doi.org/10.1038/nn.4520>
- 801 The MathWorks Inc. (2016). MATLAB R2016B. Natick, Massachusetts, United States.
- 802 Verbeke, P., & Verguts, T. (2019). Learning to synchronize: How biological agents can couple neural  
803 task modules for dealing with the stability-plasticity dilemma. *PLoS Computational Biology*,  
804 15(8). <https://doi.org/10.1371/journal.pcbi.1006604>
- 805 Verguts, T. (2017). Binding by random bursts: A computational model of cognitive control. *Journal  
806 of Cognitive Neuroscience*, 29(6), 1103–1118. <https://doi.org/10.1162/jocn>

- 807 Widrow, B., & Hoff, M. M. E. (1960). Adaptive switching circuits. *IRE WESCON Convention*  
808 *Record*, 4(1), 96–104.
- 809 Wilson, R. C., Takahashi, Y. K., Schoenbaum, G., & Niv, Y. (2014). Orbitofrontal cortex as a  
810 cognitive map of task space. *Neuron*, 81(2), 267–279.  
811 <https://doi.org/10.1016/j.neuron.2013.11.005>
- 812 Womelsdorf, T., Johnston, K., Vinck, M., & Everling, S. (2010). Theta-activity in anterior cingulate  
813 cortex predicts task rules and their adjustments following errors. *Proceedings of the National*  
814 *Academy of Sciences*, 107(11), 5248–5253. <https://doi.org/10.1073/pnas.0906194107>
- 815 Womelsdorf, T., Schoffelen, J., Oostenveld, R., Singer, W., Desimone, R., Engel, A. K., & Fries, P.  
816 (2007). Modulation of neuronal interactions through neuronal synchronization. *Science*,  
817 316(1609), 1609–1612. <https://doi.org/10.1126/science.1139178>
- 818 Zhou, T., Chen, L., & Aihara, K. (2005). Molecular communication through stochastic  
819 synchronization Induced by extracellular fluctuations. *Physical Review Letters*,  
820 178103(October), 2–5. <https://doi.org/10.1103/PhysRevLett.95.178103>
- 821
